# Supplementary material
Source: Copernicus journal article supplement (doi:10.5194/ejm-38-263-2026)

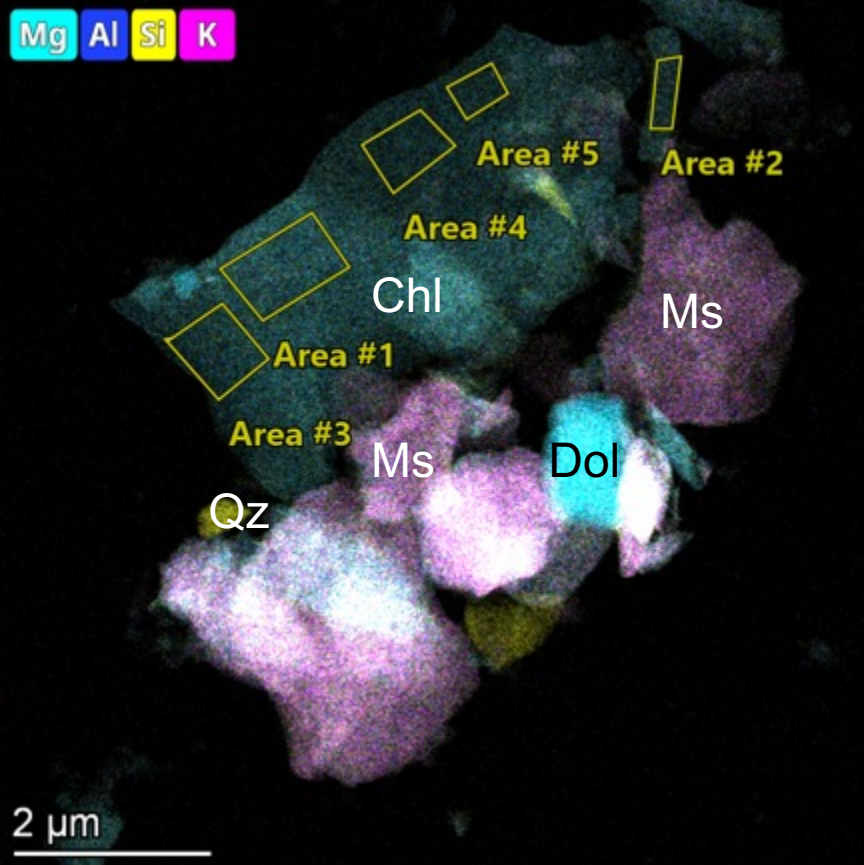

TEM compositional map and chlorite spectra corresponding to different areas. Dol: dolomite, Chl: chlorite, Ms: muscovite, Qz: quartz.

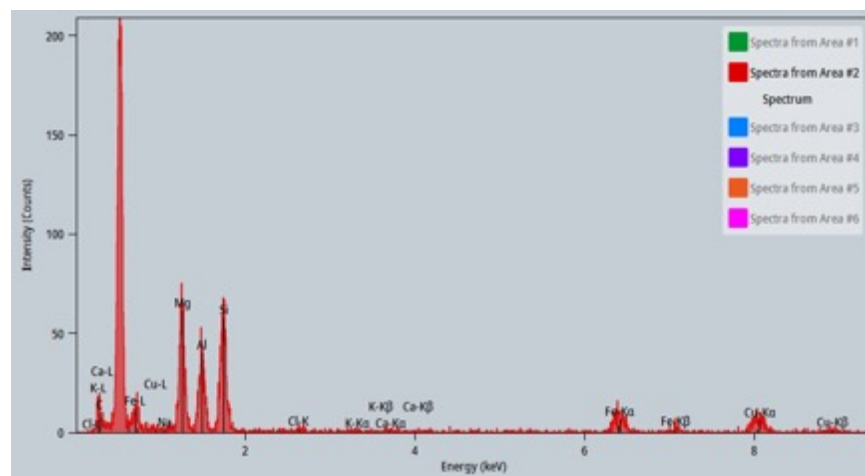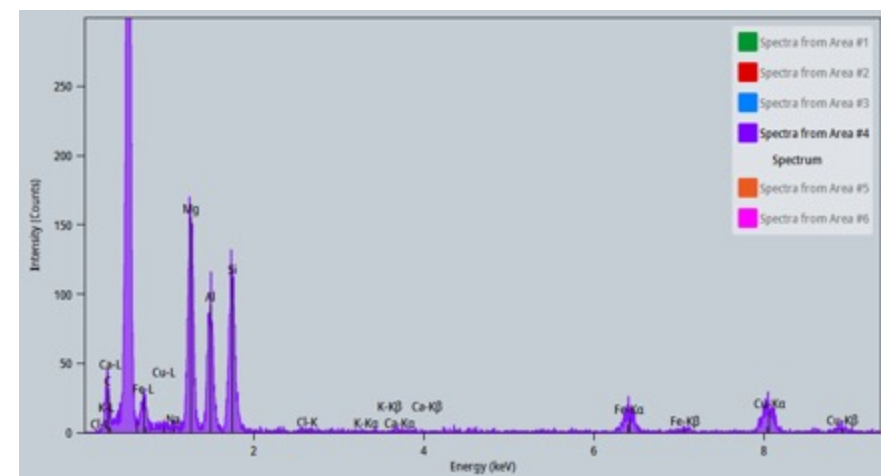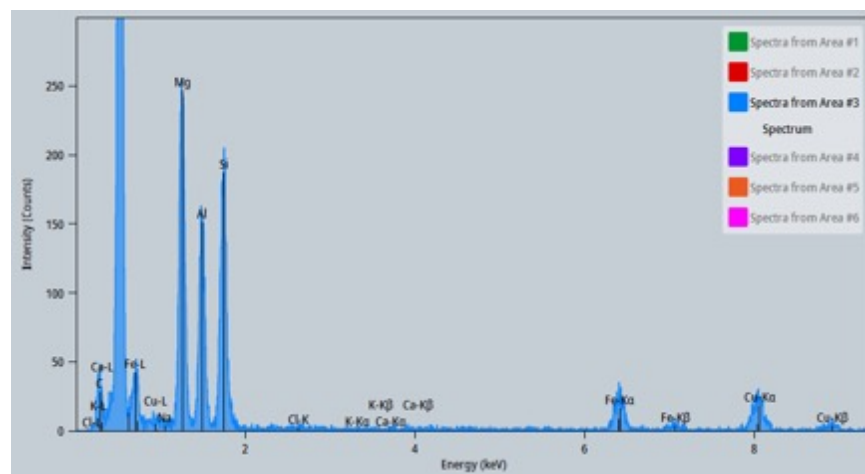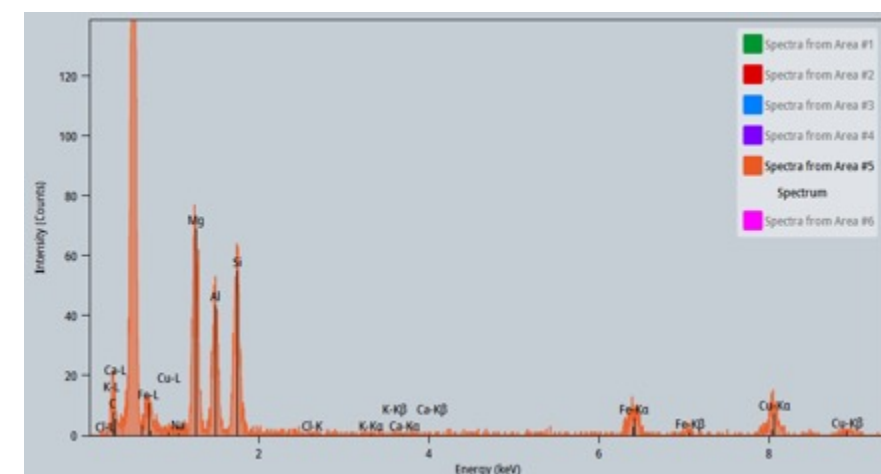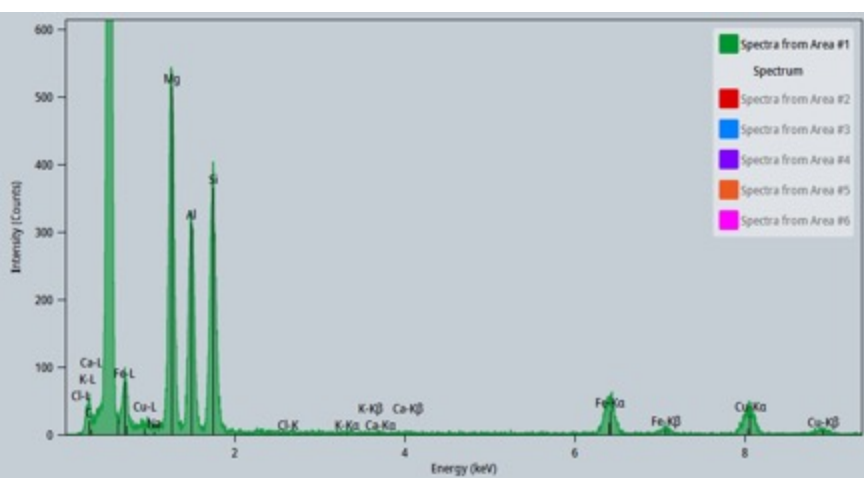

Supplement: Supplementary file 4 [file fS05.pdf › fS05.pdf]
