# Supplementary material
Source: Copernicus journal article supplement (doi:10.5194/ejm-38-263-2026)
Supplement: Supplementary file [file ejm-38-263-2026-supplement-title-page.pdf › ejm-38-263-2026-supplement-title-page.pdf]

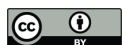

## *Supplement of*

# **Retrograde crystallization of clay minerals in metamorphic rocks linked to fluid circulation related to fault activity**

**Isabel Abad et al.**

*Correspondence to:* Isabel Abad (miabad@ujaen.es)

- ejm-38-263-2026-supplement-title-page.pdf
- Captions of supplementary tables and figures.docx
- Table S1.docx
- Table S2.docx
- fS01.pdf
- fS03.pdf
- fS04.pdf
- fS05.pdf
- fs02.pdf

The copyright of individual parts of the supplement might differ from the article licence.
