# Supplementary material
Source: Copernicus journal article supplement (doi:10.5194/ejm-38-263-2026)

EDS spectra of the minerals identified in the dark schists in the BSE images

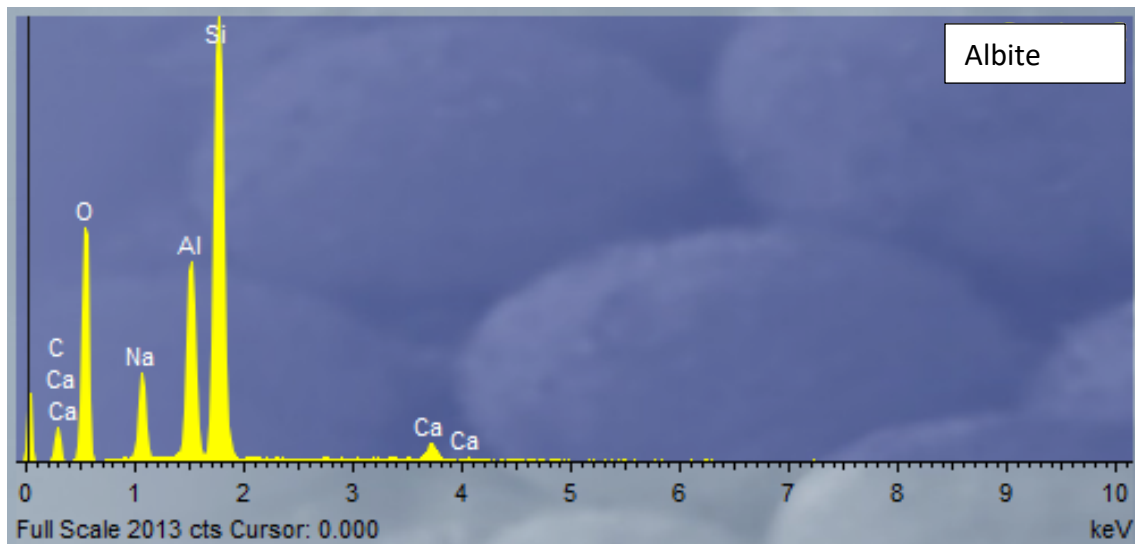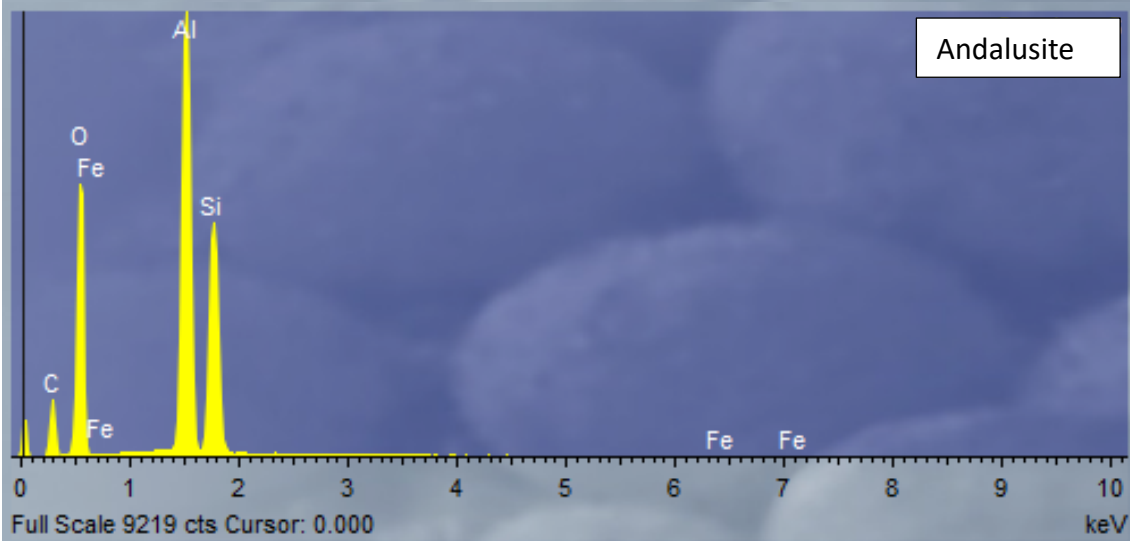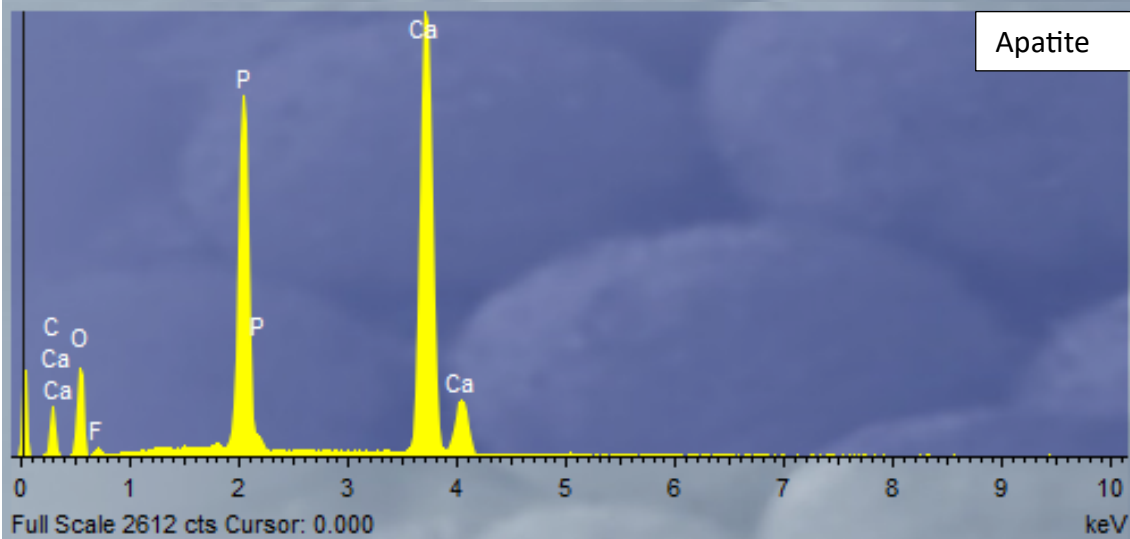

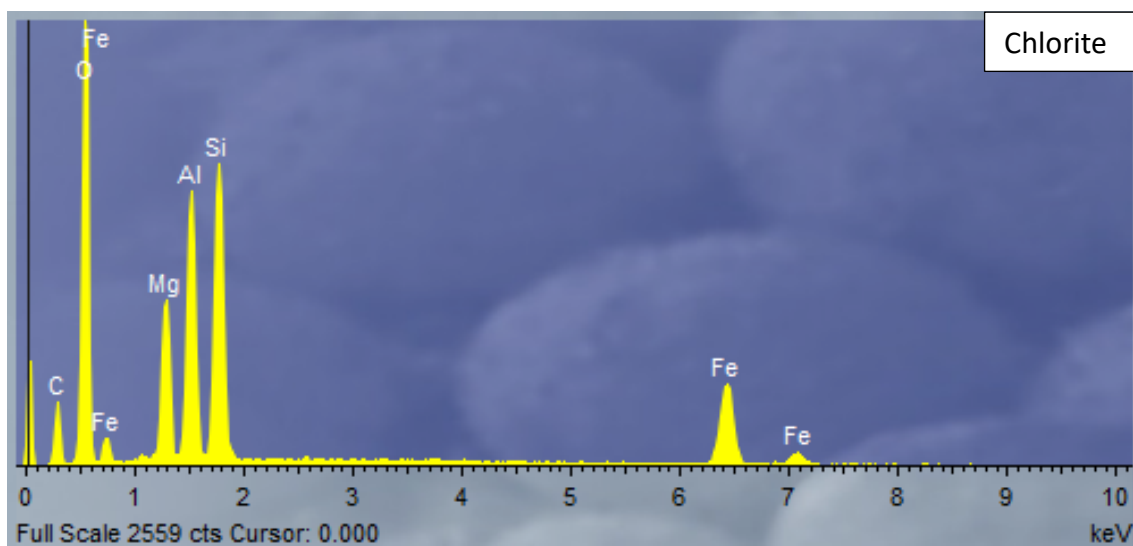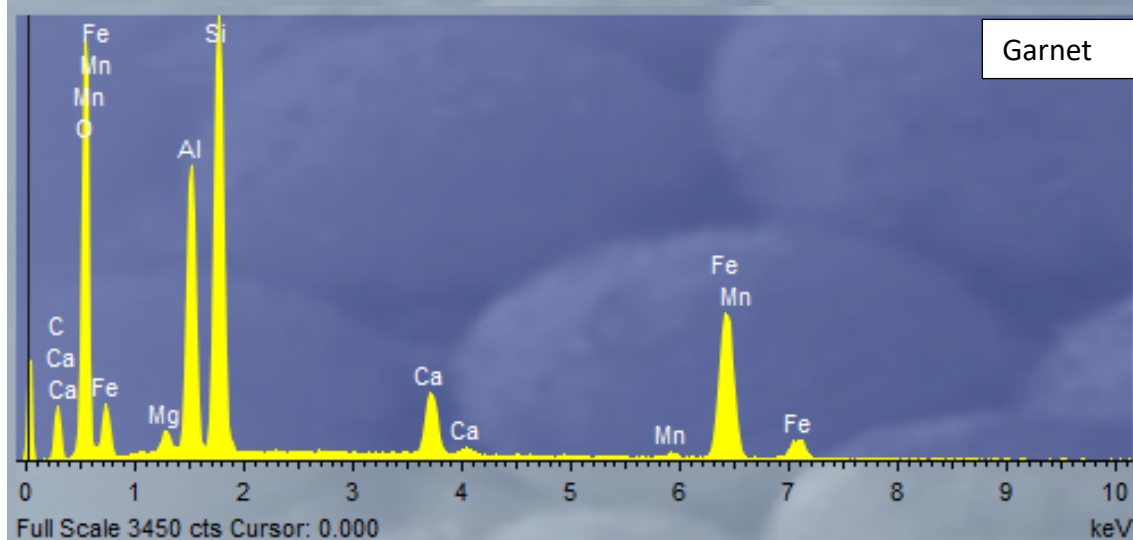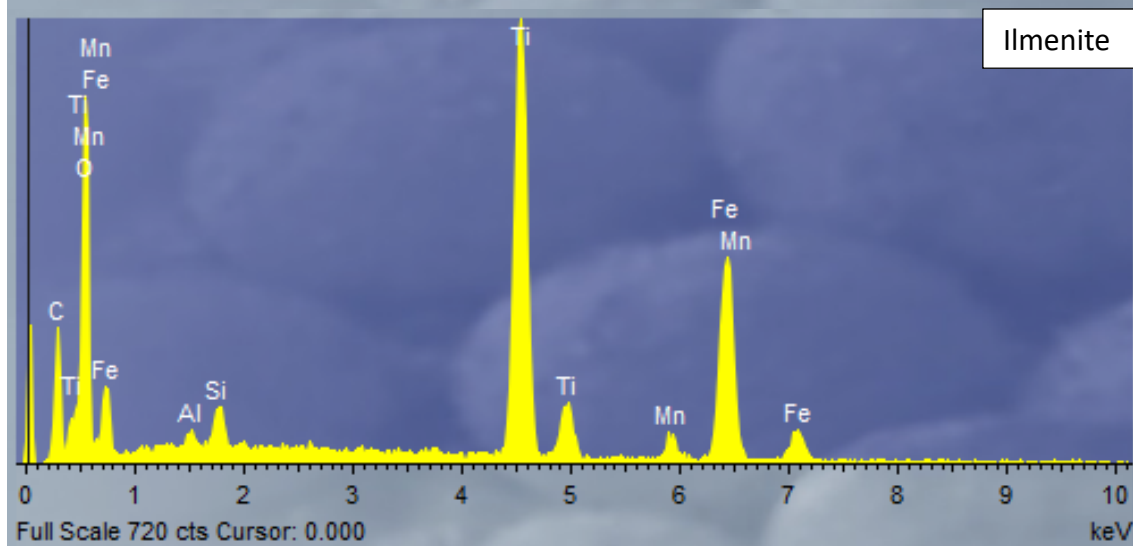

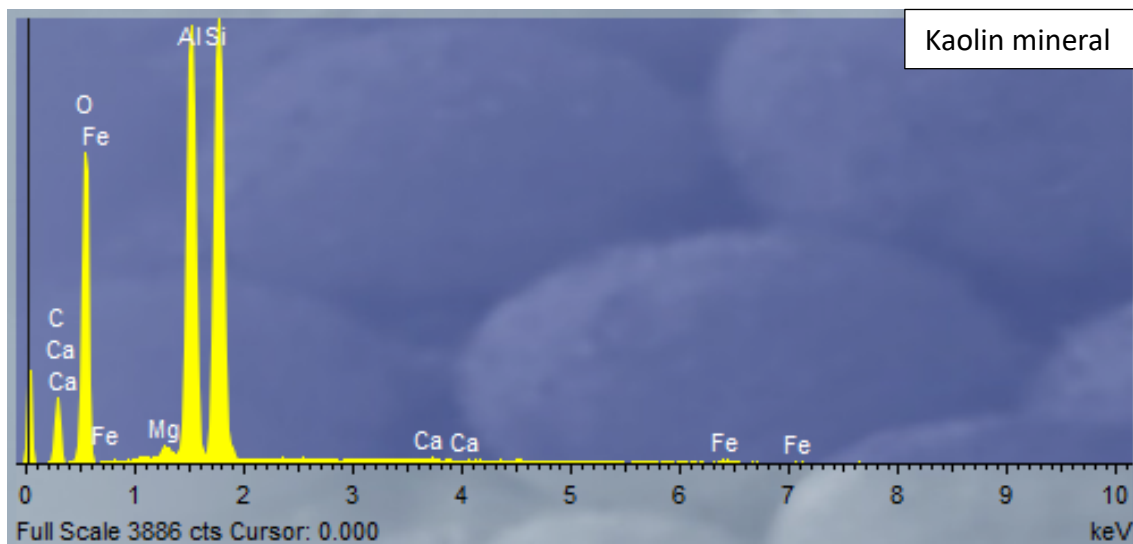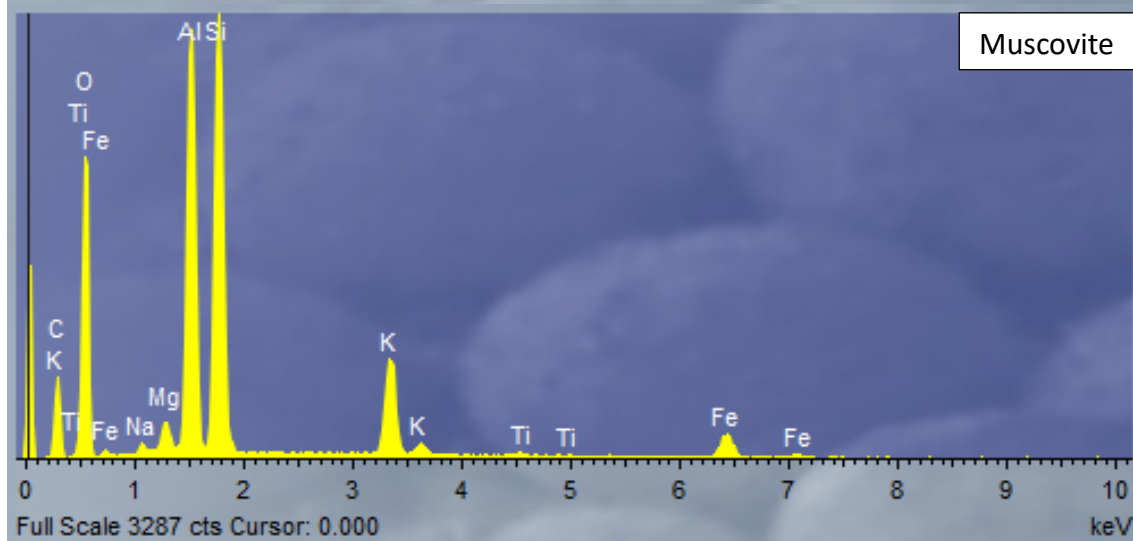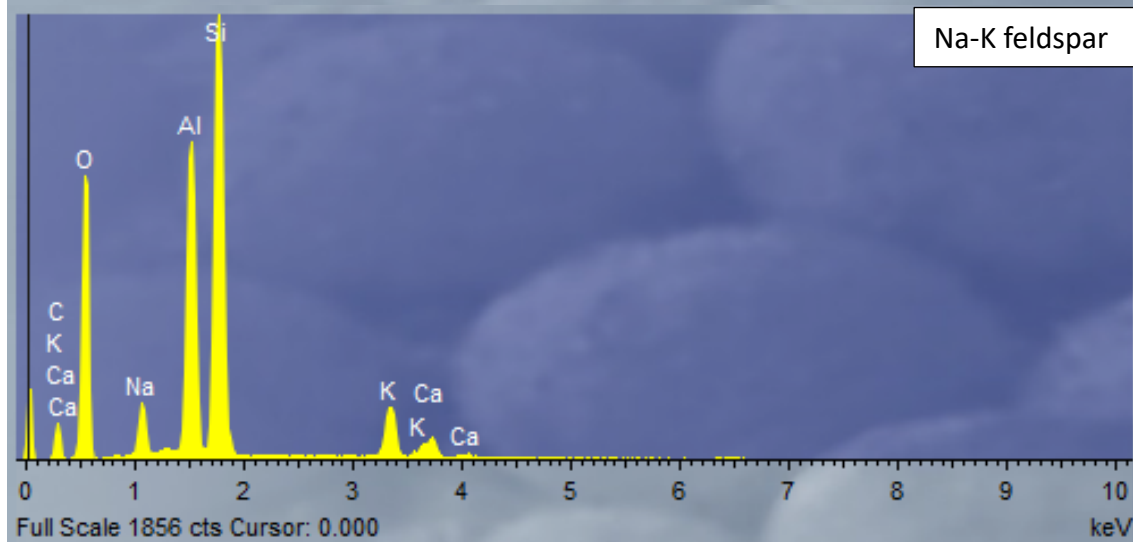

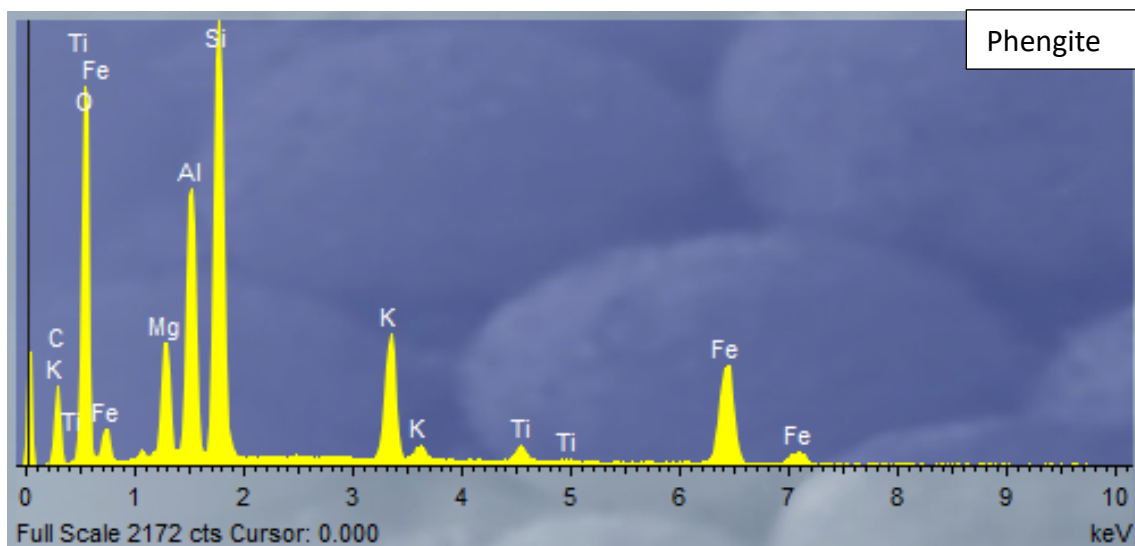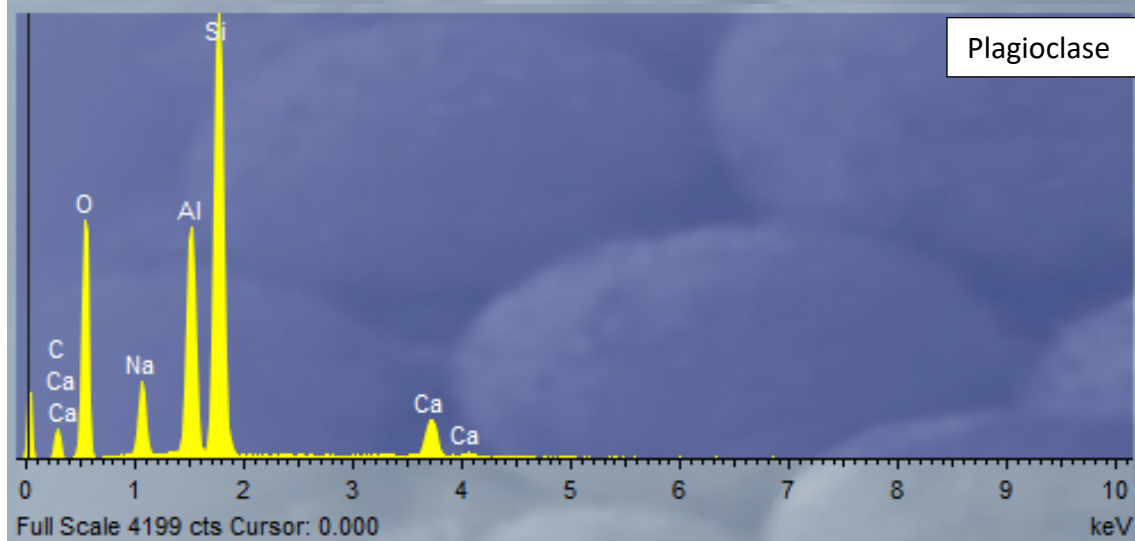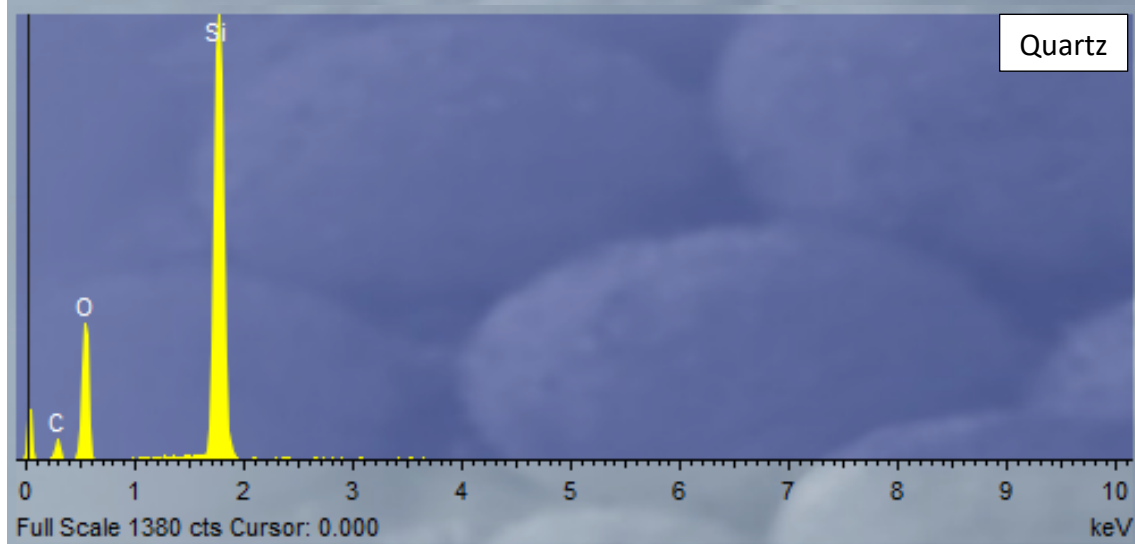

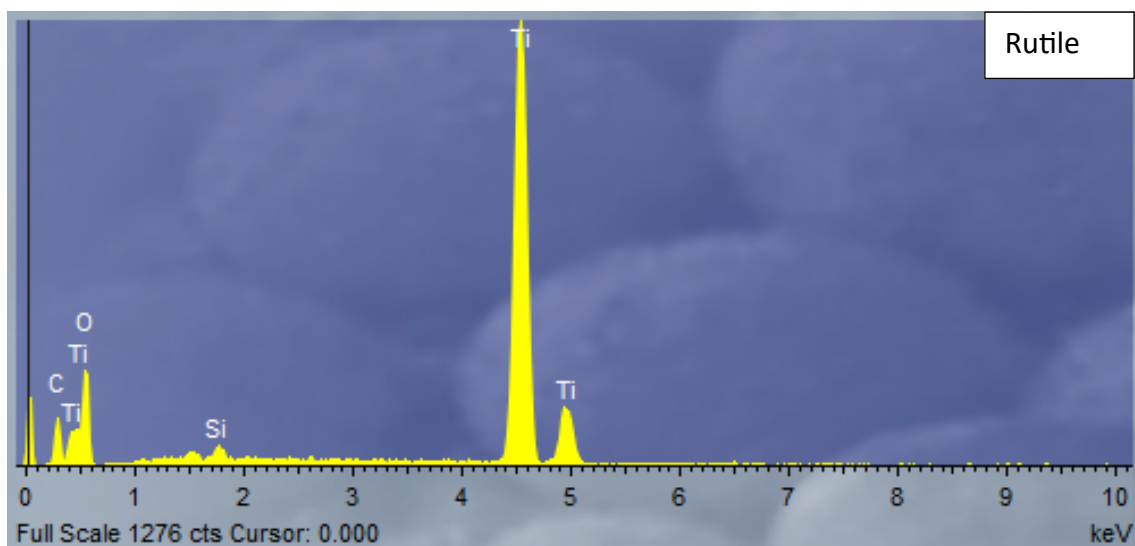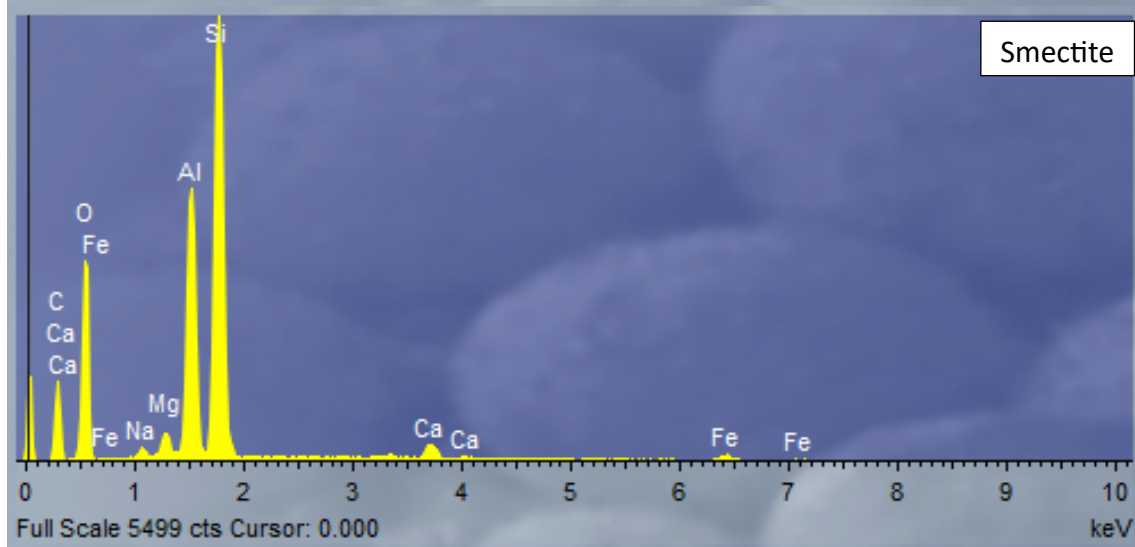

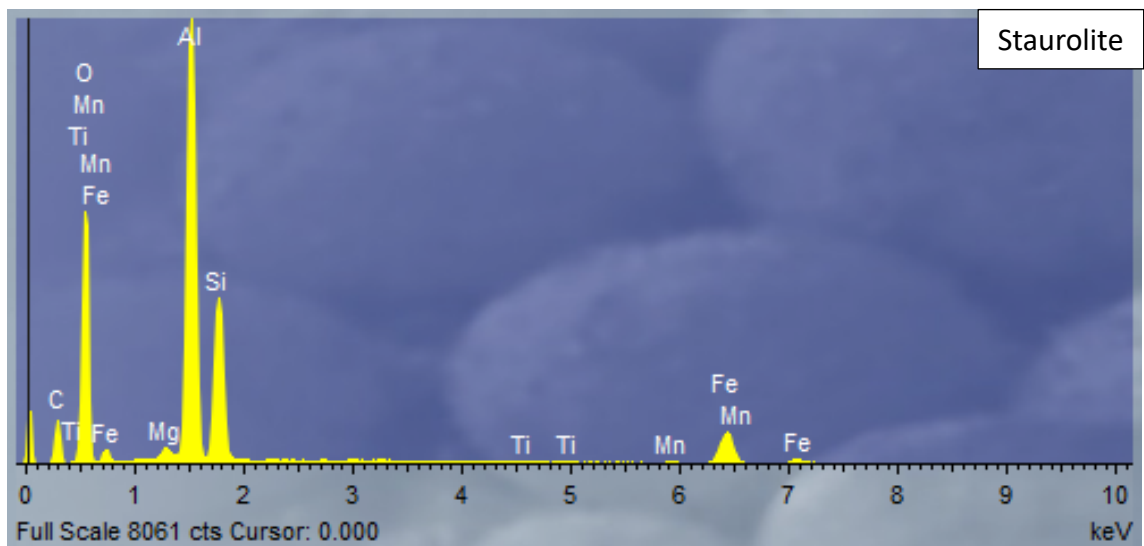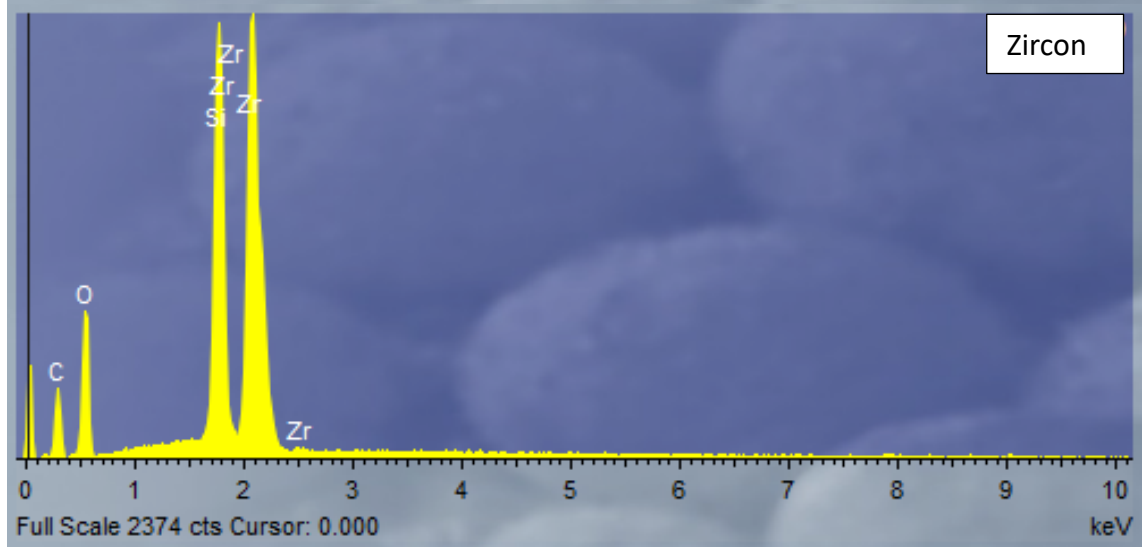

Supplement: Supplementary file 1 [file fS01.pdf › fS01.pdf]

EDS spectra of the minerals identified in the fresh calc-schists in the BSE images

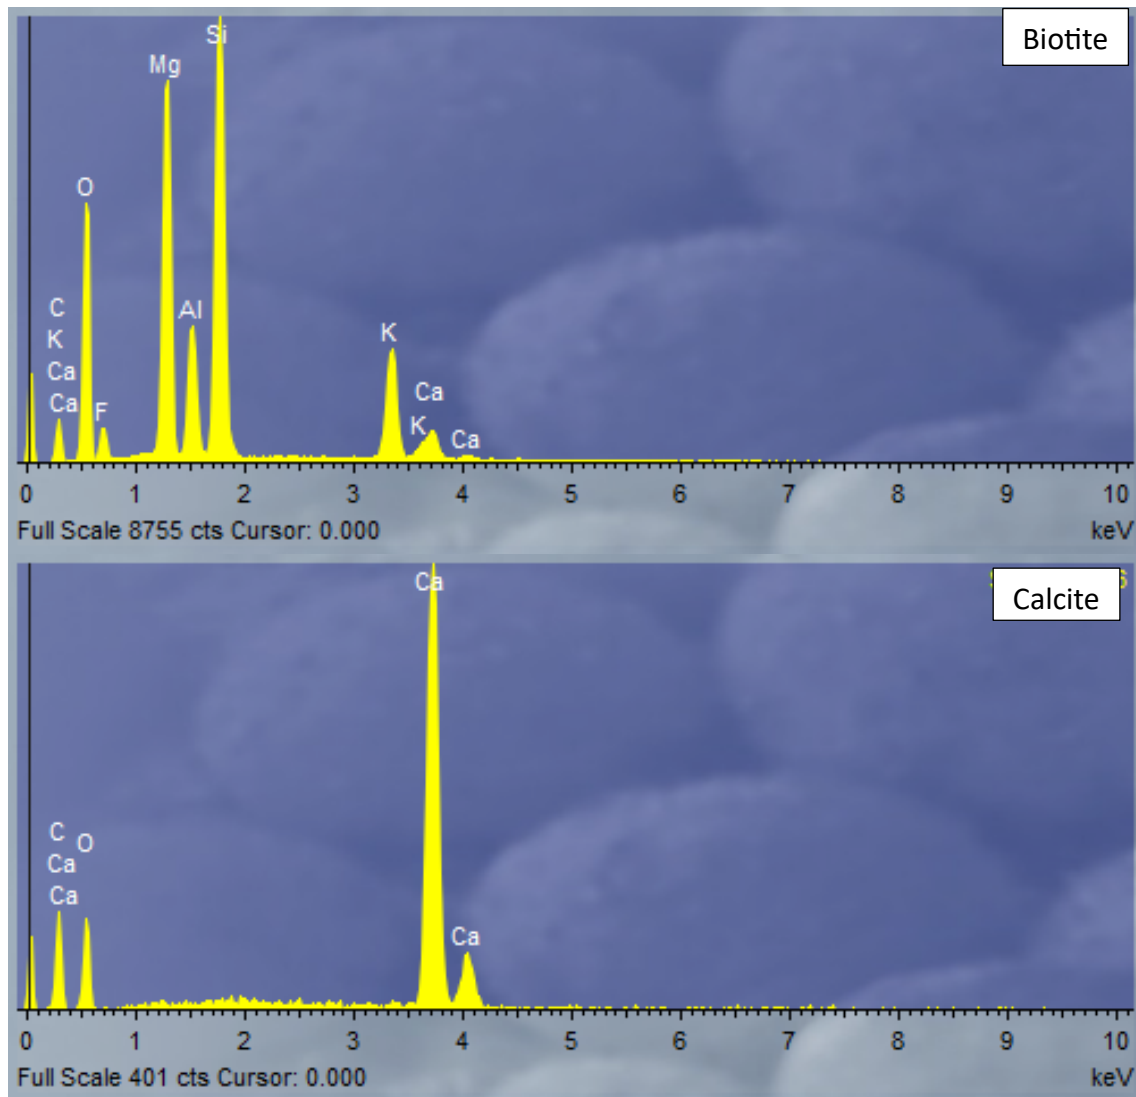

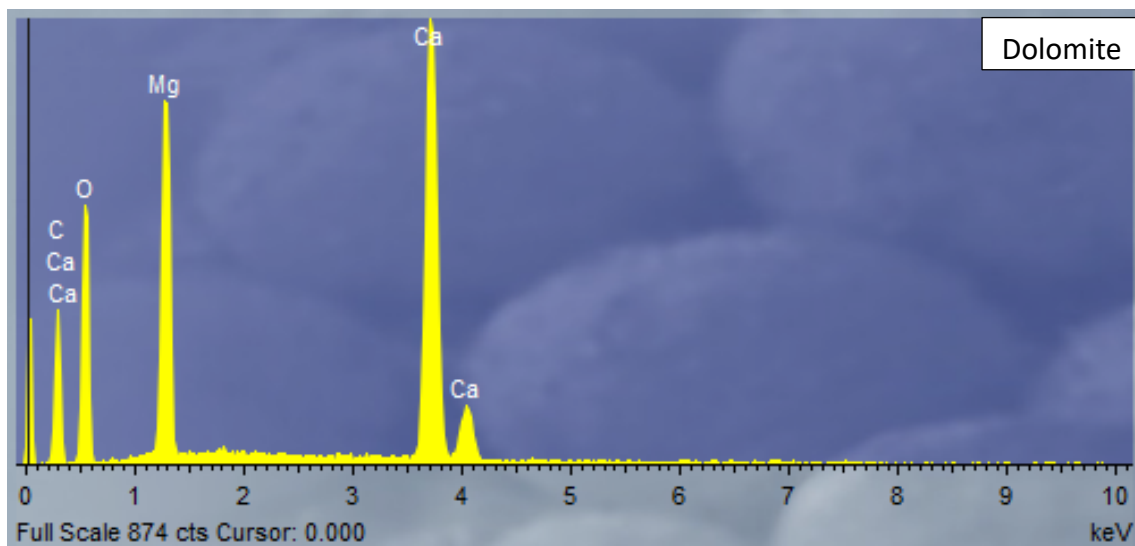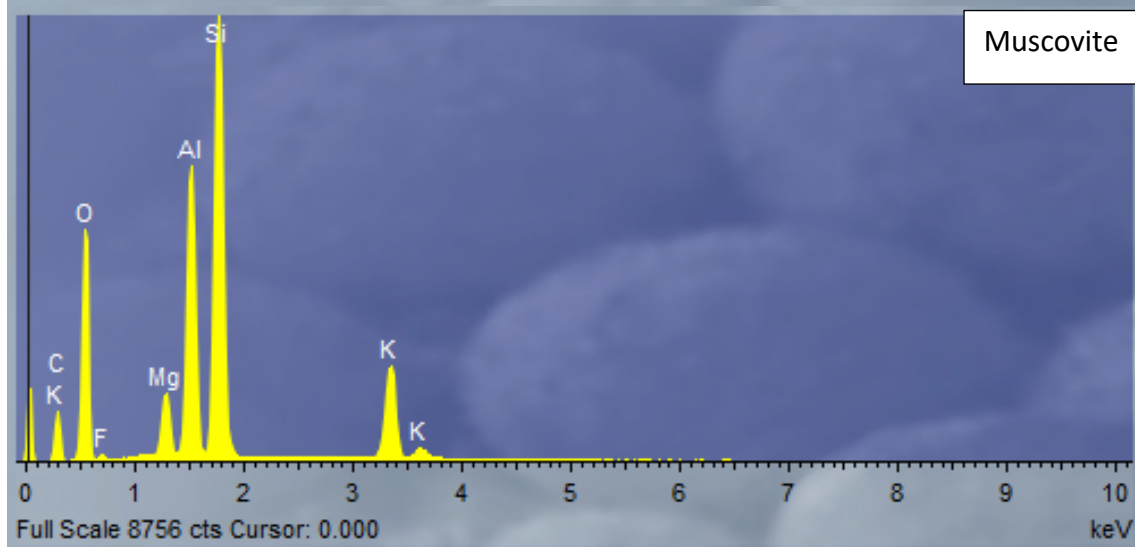

Supplement: Supplementary file 2 [file fS03.pdf › fS03.pdf]

EDS spectra of the minerals identified in the fault calc-schists in the BSE images

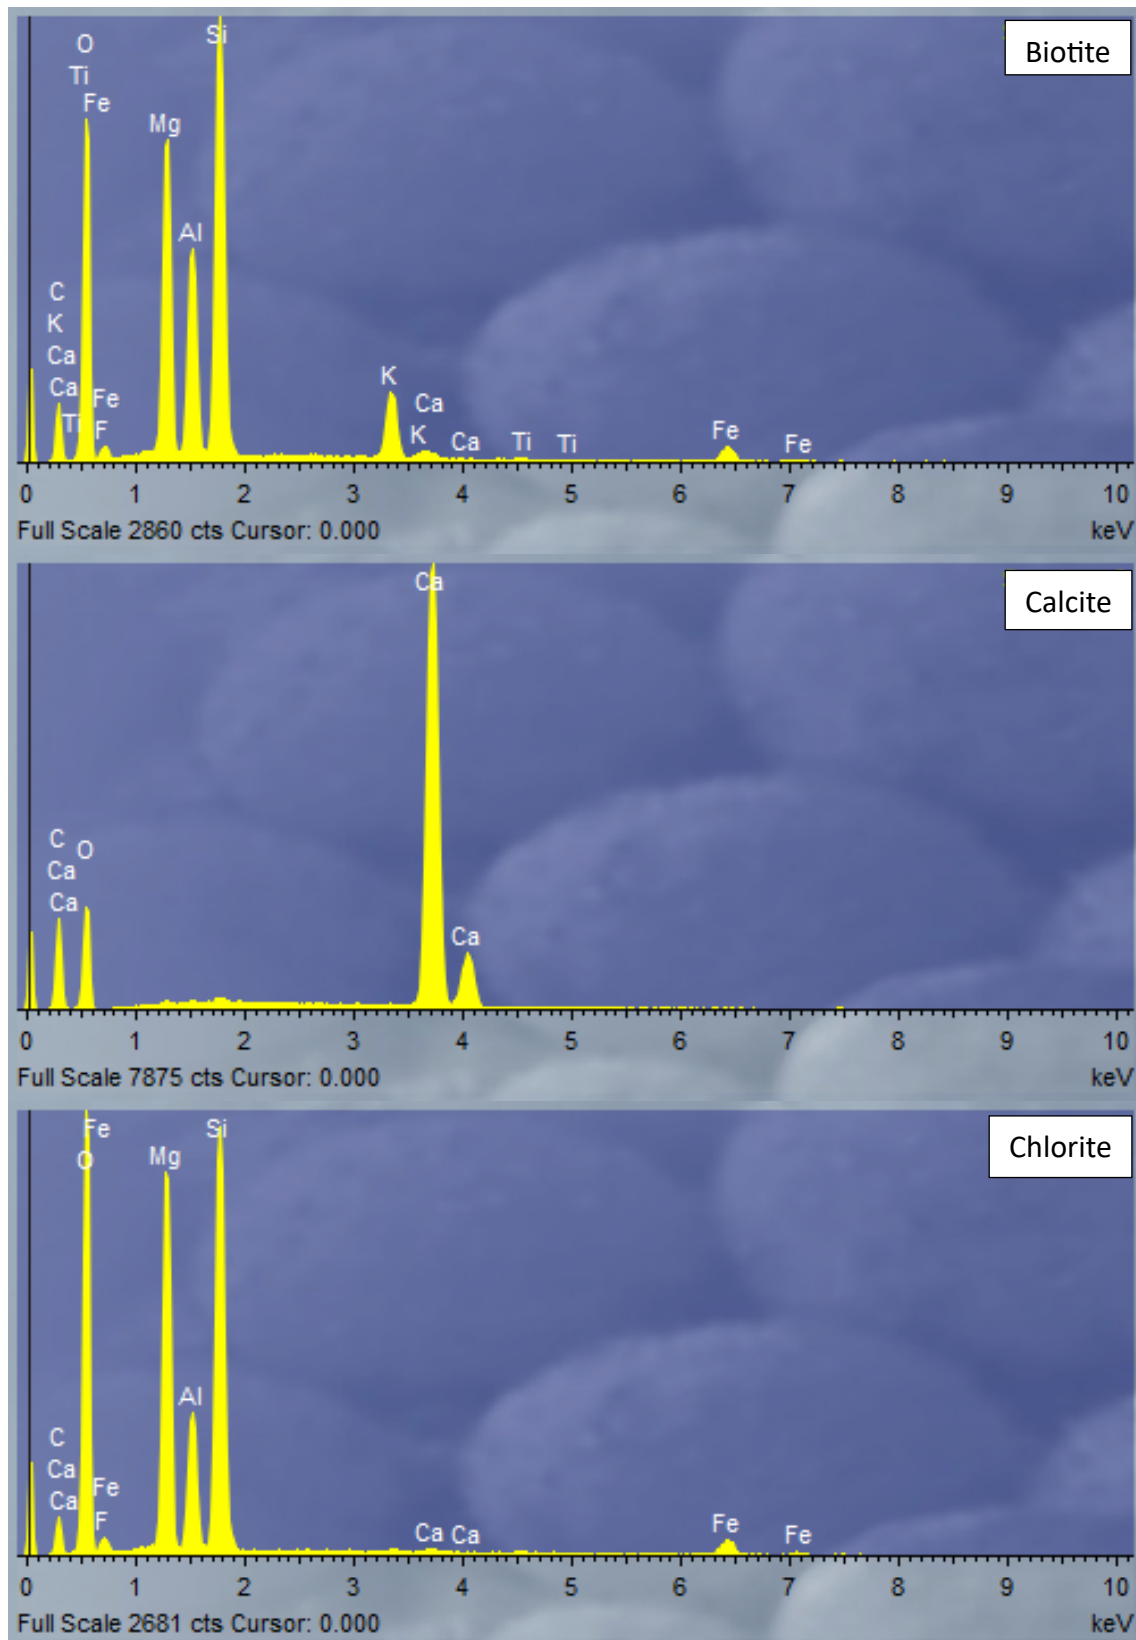

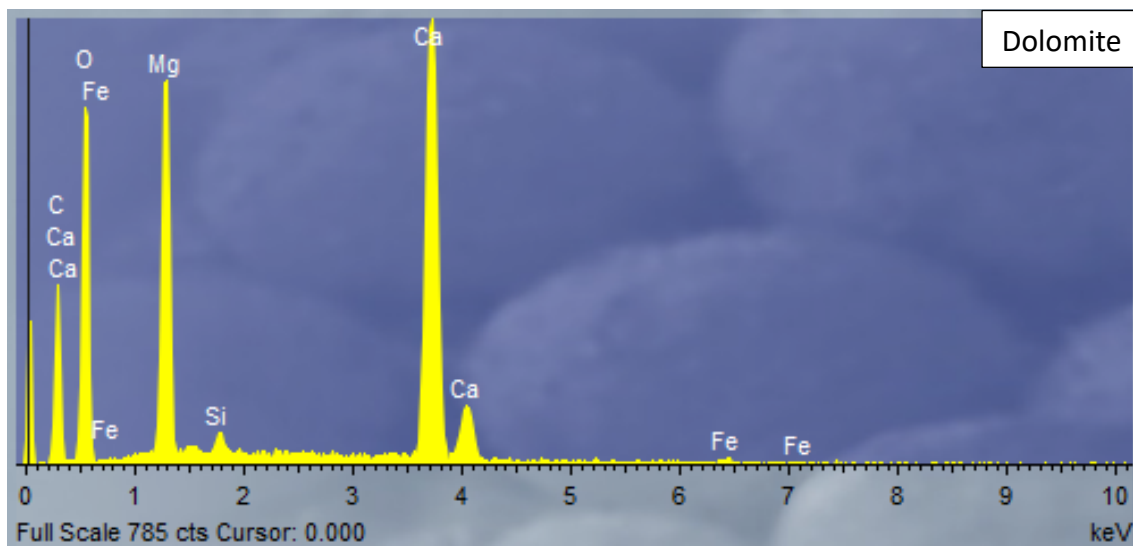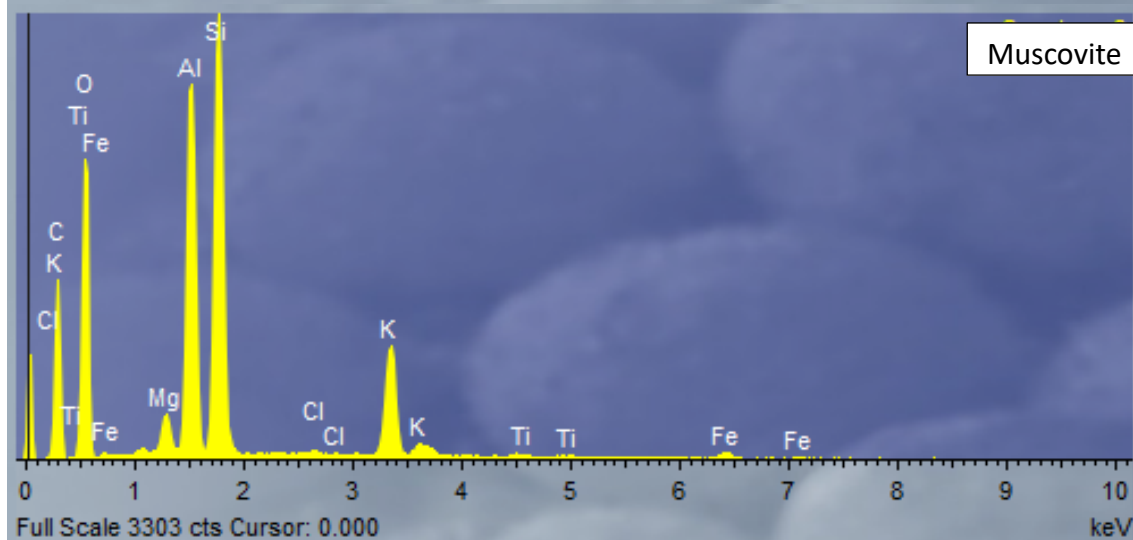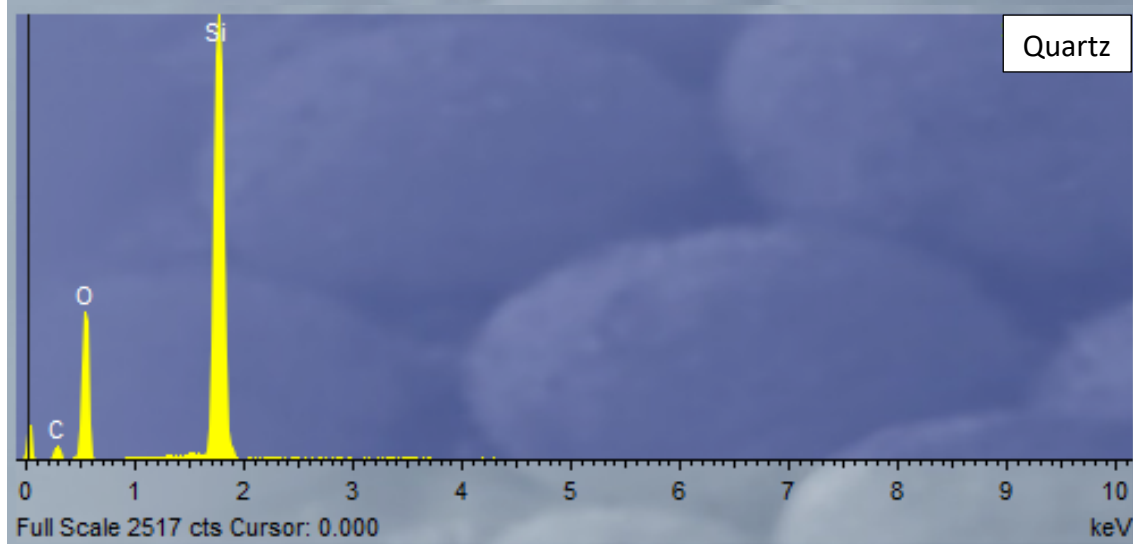

Supplement: Supplementary file 3 [file fS04.pdf › fS04.pdf]

EDS spectra of the minerals identified in the fault dark schists in the BSE images

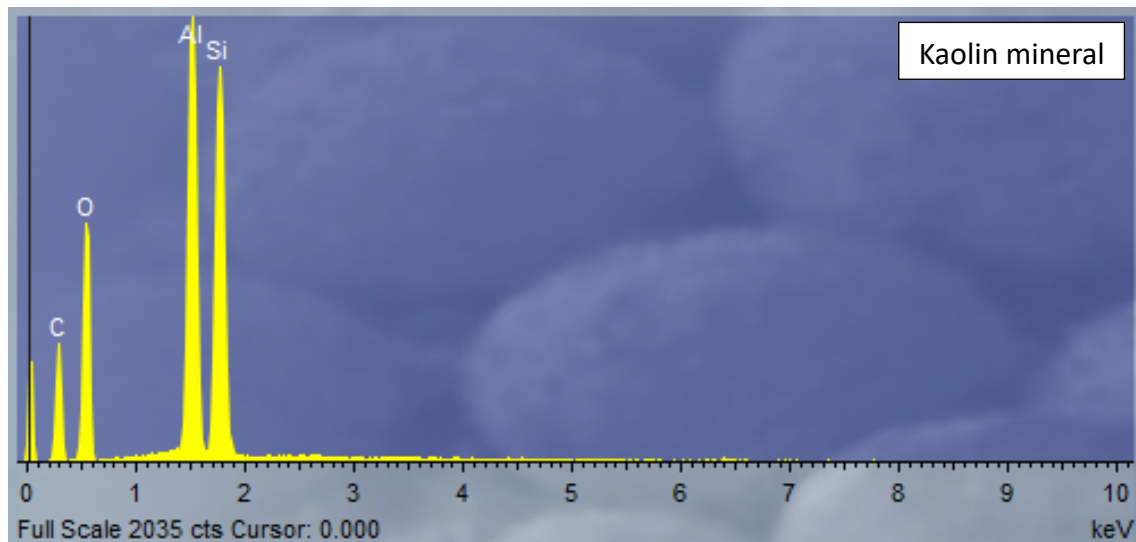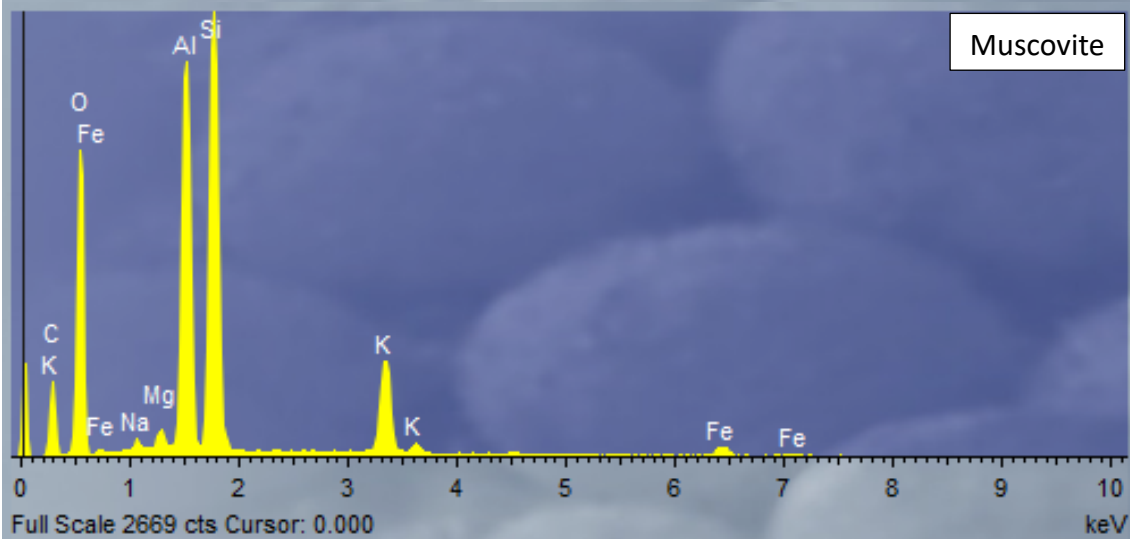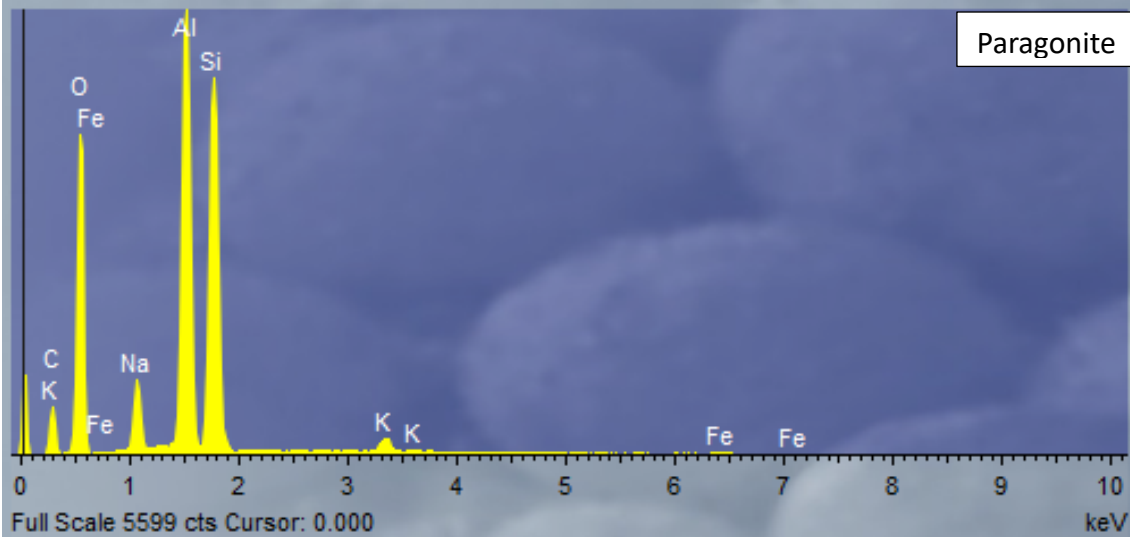

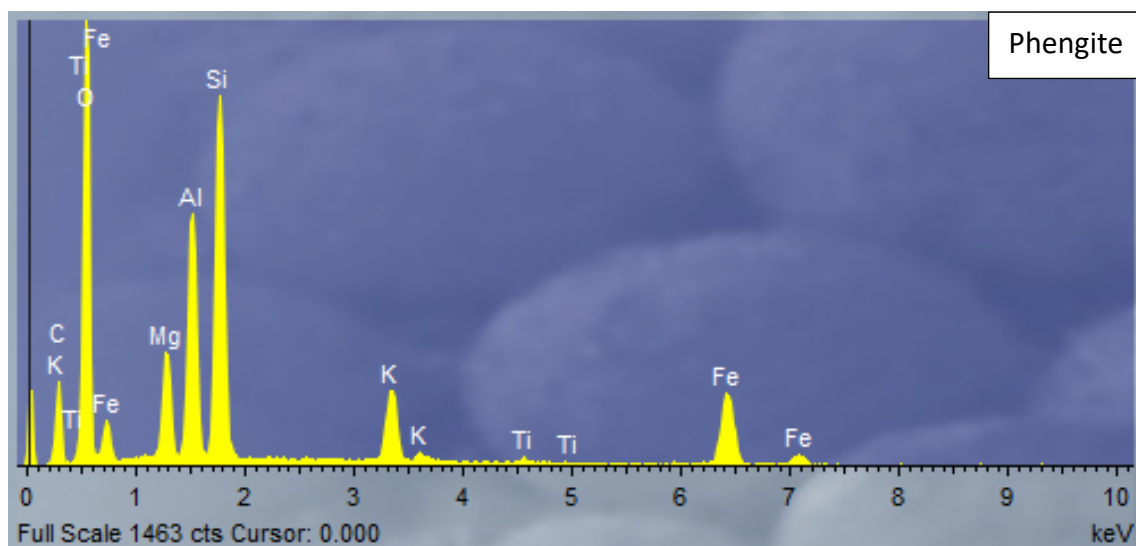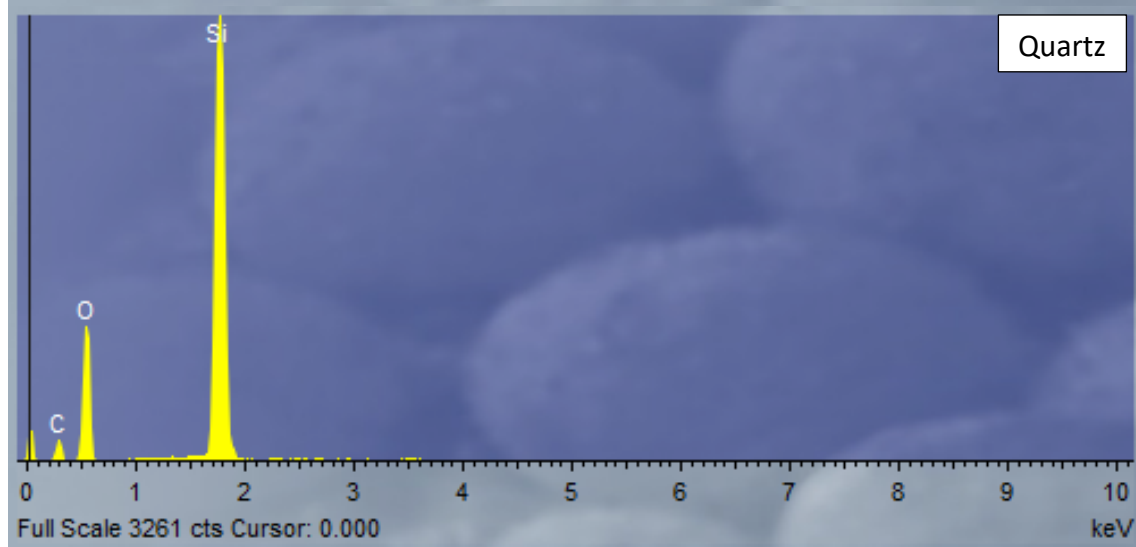

Supplement: Supplementary file 5 [file fs02.pdf › fs02.pdf]
